# Supplementary material for: Development of a Solid-Phase Extraction (SPE) Cartridge Based on Chitosan-Metal Oxide Nanoparticles (Ch-MO NPs) for Extraction of Pesticides from Water and Determination by HPLC
Source: PubMed Central journal article supplement (PMC6189673; doi:10.1155/2018/3640691), 2018-10-02
Supplement: 3640691.f1.pdf [file 3640691.f1.pdf]

1 **SUPPLEMENTAL MATERIAL**

2

3 **Development of a solid-phase extraction (SPE) cartridge based on chitosan-metal oxide**  
4 **nanoparticles (Ch-MO NPs) for extraction of pesticides from water and determination by**  
5 **HPLC**

6

7 **Mohamed E. I. Badawy\***, Mahmoud A. M. El-Nouby, Abd El-Salam M. Marei

8 *Department of Pesticide Chemistry and Technology, Faculty of Agriculture, 21545-El-Shatby,*  
9 *Alexandria University, Alexandria, Egypt*

10

11 \* Address correspondence to Mohamed E. I. Badawy, Department of Pesticide Chemistry and  
12 Technology, Faculty of Agriculture, 21545-El-Shatby, Alexandria University, Alexandria, Egypt.  
13 Phone: 002039575269; Fax: 002035972780; E-mail: [m\\_eltaher@yahoo.com](mailto:m_eltaher@yahoo.com)

26 **3.5. Adsorption isotherm study**

27 Adsorption isotherm models are important to determine the efficiency of the adsorption  
28 process. Adsorption isotherms illustrate the connection between the amount of adsorbed  
29 component per adsorbent weight and the concentration of the contaminated components in the  
30 solution. Determination of the adsorption parameters provides useful information, which can  
31 improve the adsorption efficiency of the systems. In the present study, the adsorption percentages  
32 were applied in Freundlich (1) and Langmuir (2) isotherm models as follows to predict which  
33 model is fit.

34 
$$q=K_f C^n \dots\dots\dots (1)$$

35 
$$q= \frac{q_{max} K_1 C}{1+K_1 C} \dots\dots\dots (2)$$

36 Where q = adsorption capacity (µg/g); K<sub>f</sub> = Freundlich isotherm constant (µg/g); C =  
37 concentration of the analyte (adsorbate) in the solution at equilibrium (µg/mL), n = adsorption  
38 intensity; q<sub>max</sub> = maximum adsorption monolayer capacity (µg/g); K<sub>1</sub> = Langmuir isotherm  
39 constant (mL/µg).

40 By analyzing the linear correlation coefficient (R<sup>2</sup>) obtained, it is possible to identify the  
41 isotherm model that best represent the experimental data of this study [1]. From the values of R<sup>2</sup>  
42 obtained (Table S2) for the Ch-MO NPs, it is possible to conclude that both of Langmuir and  
43 Freundlich isotherms are fit to this study with R<sup>2</sup> > 0.92. When the experimental data follows the  
44 Langmuir model, this assumes that a monomolecular layer is formed when adsorption takes place  
45 without any interaction between the adsorbed molecules. However, the data follows the Freundlich  
46 isotherm, this means that the adsorption process takes place on heterogeneous surfaces and  
47 adsorption capacity is related to the concentration of the analyte at equilibrium [2]. The maximum  
48 adsorption capacity (q<sub>max</sub>) of Ch-MO NPs was observed for all the tested pesticides. The Ch-CuO

49 NPs and Ch-ZnO NPs showed the highest adsorption capacities ( $2.50 \times 10^4$  and  $1.00 \times 10^5$   $\mu\text{g/g}$ ,  
50 respectively for thiophanate-methyl compared to  $1.00 \times 10^4$   $\mu\text{g/g}$  by using ODS ( $\text{C}_{18}$ ). However,  
51 the insecticide methomyl showed a low  $q_{\text{max}}$  on Ch-CuO NPs and Ch-ZnO NPs ( $2.00 \times 10^3$ ,  
52  $1.00 \times 10^3 \mu\text{g/g}$ , respectively) compared to  $2.86 \times 10^2$  by using ODS ( $\text{C}_{18}$ ).

### 53 **References**

- 54 1. P. Silva, J. Francisco, J. Cajé, R. Cassella, and W. Pacheco. "A batch and fixed bed column  
55 study for fluorescein removal using chitosan modified by epichlorohydrin," *Journal of*  
56 *Environmental Science and Health, Part A*, vol. 53, pp. 55-64, 2018.
- 57 2. F. Naseeruteen, N. S. A. Hamid, F. B. M. Suah, W. S. W. Ngah, and F. S. Mehamod.  
58 "Adsorption of malachite green from aqueous solution by using novel chitosan ionic liquid  
59 beads," *International Journal of Biological Macromolecules*, vol. 107, pp. 1270-1277,  
60 2017.

61

62

63

64

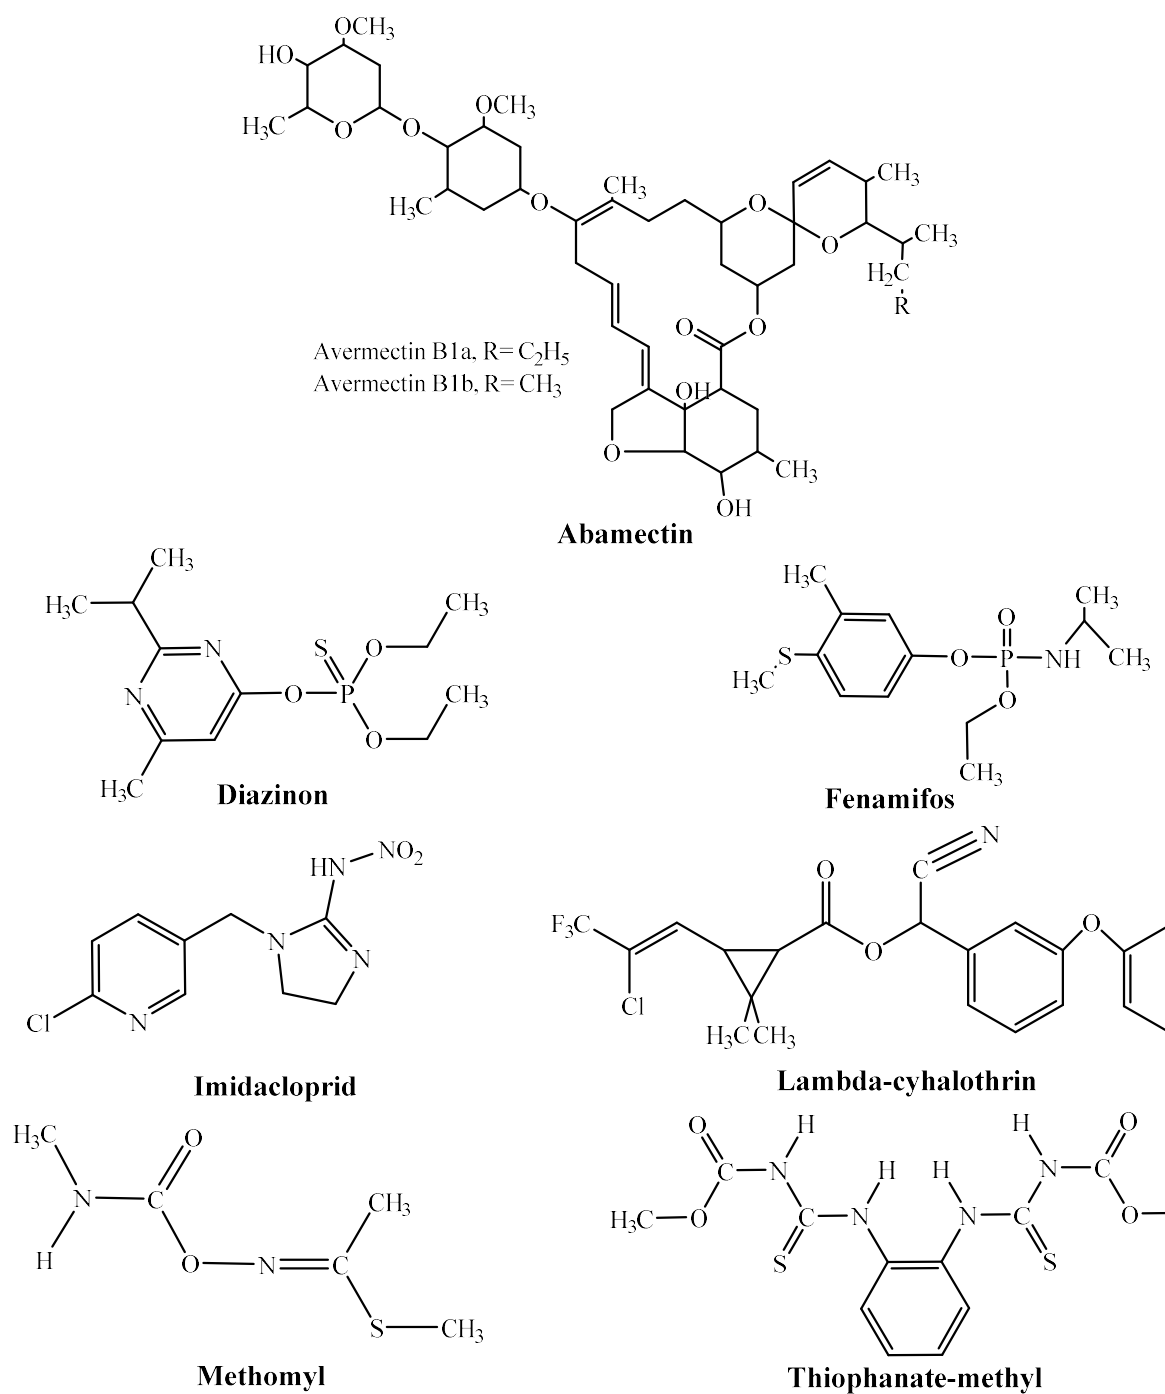

65 **Figure S1.** Abamectin is the International Organization for Standardization (ISO)-approved  
66 common name for a mixture of the components avermectin B1a ( $\geq 80\%$ ) and avermectin B1b ( $\leq$   
67 20%). Chlorpyrifos methyl, diazinon and fenamifos are organophosphorus insecticides.  
68 Imidacloprid is a neonicotinoid insecticide. Lambda-cyhalothrin is a pyrethroid insecticide.  
69 Methomyl is a carbamate insecticide and thiophanate-methyl is a thiocarbamate fungicide.  
70  
71

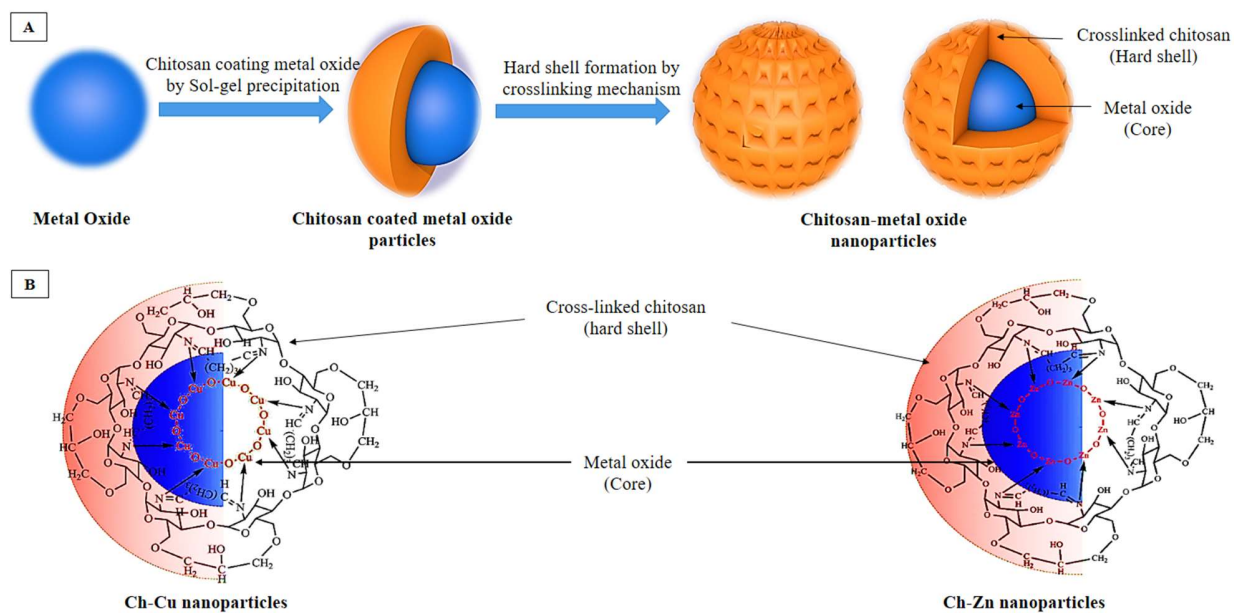

72

73 **Figure S2.** 3D-schematic diagram for preparation mechanism of chitosan-metal oxide  
 74 nanoparticles (Ch-MO NPs) (A) and proposed chemical structure (B).

75

76

77

78

79

80

81

82

83

84

85

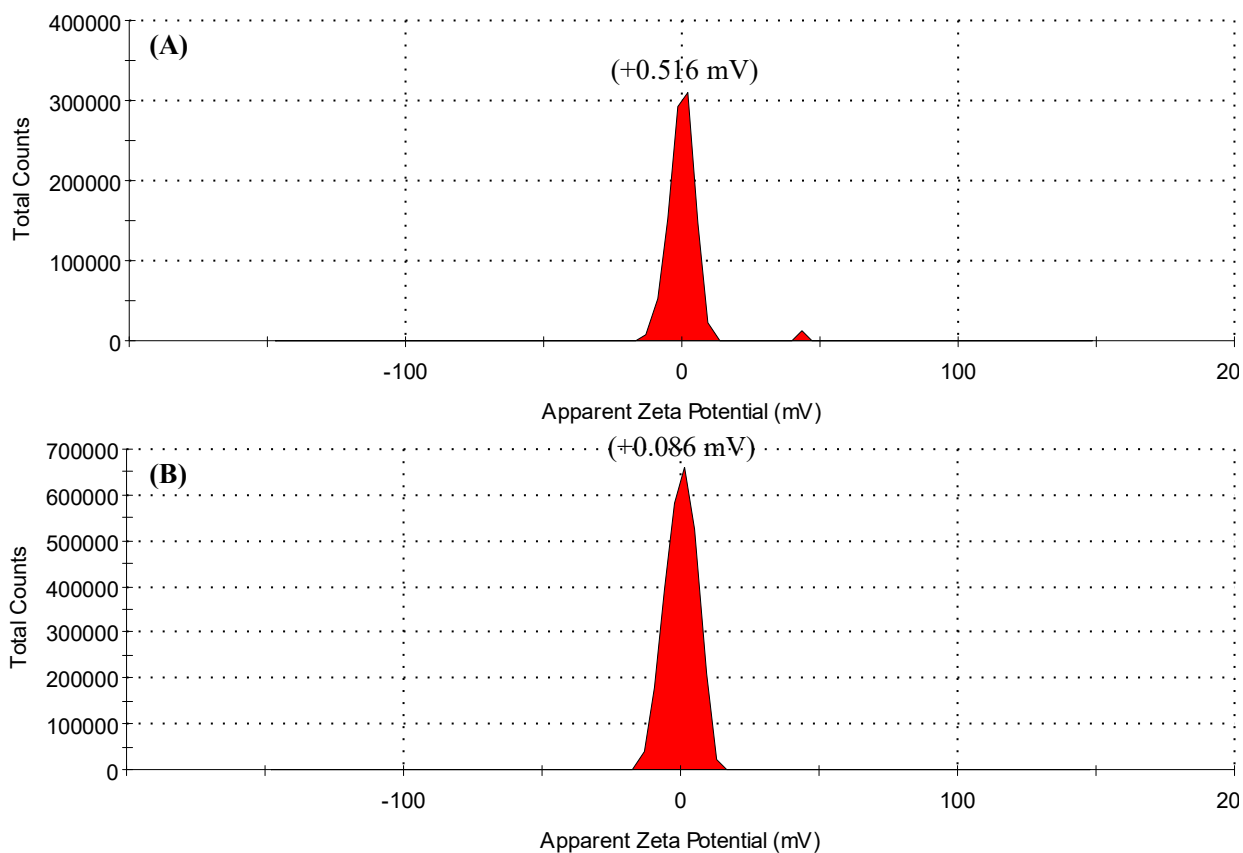

86 **Figure S3.** Zeta potential distribution graph of chitosan-metal oxide nanoparticles (Ch-MO NPs)  
 87 (A) chitosan-copper oxide nanoparticles (Ch-CuO NPs) and (B) chitosan-Zinc oxide nanoparticles  
 88 (Ch-ZnO NPs).

89  
 90  
 91  
 92  
 93  
 94  
 95  
 96

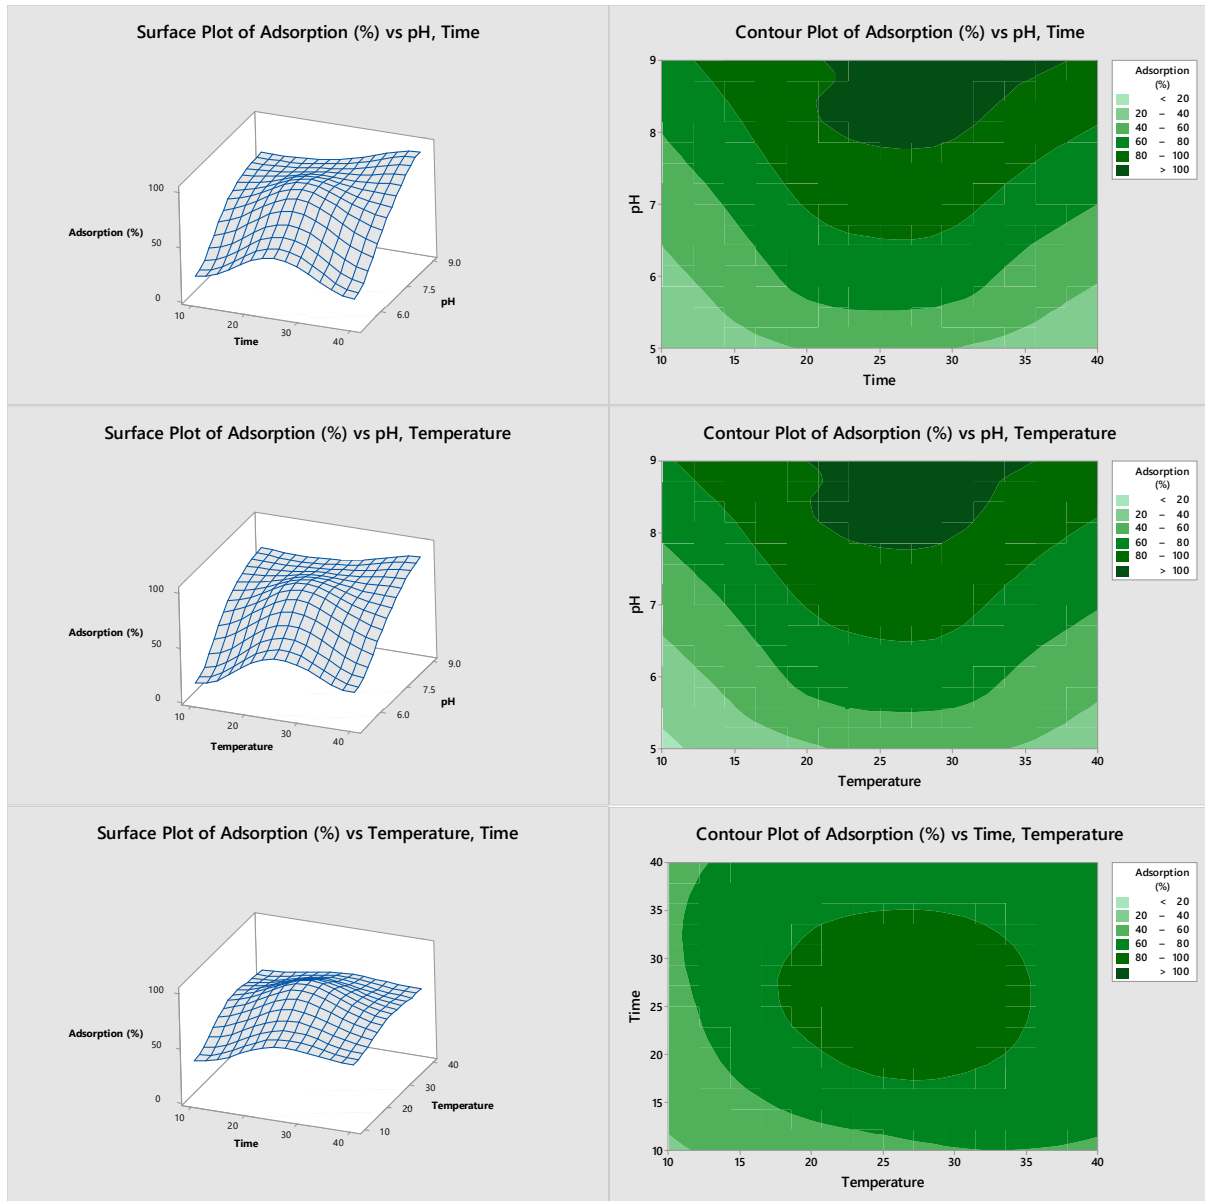

98 **Figure S4.** Surface plot and contour plot of the adsorption (%) of imidacloprid insecticide on Ch-  
 99 CuO NPs vs temperature, pH and agitation time.

100

101

102

103

**Table S1.** Summary of methods conditions used for determination of different pesticides by HPLC system

| Pesticide          | Column                 | Chromatographic conditions                |                       |                               |                                |                   |
|--------------------|------------------------|-------------------------------------------|-----------------------|-------------------------------|--------------------------------|-------------------|
|                    |                        | Mobile phase composition<br>(% by volume) | Flow rate<br>(mL/min) | Column<br>temperature<br>(°C) | Detector<br>wavelength<br>(nm) | Elution<br>system |
| Abamectin          | ZORBAX Eclips Plus C18 | Acetonitrile:Methanol:Water (10:80:10)    | 1.0                   | 40                            | 245                            | Isocratic         |
| Diazinon           | ZORBAX Eclips Plus C18 | Methanol:Water (40:60)                    | 1.0                   | 25                            | 252                            | Isocratic         |
| Fenamiphos         | ZORBAX Eclips Plus C18 | Acetonitrile:Water (40:60)                | 1.0                   | 40                            | 249                            | Isocratic         |
| Imidacloprid       | ZORBAX Eclips Plus C18 | Acetonitrile:Water (40:60)                | 1.0                   | 40                            | 269                            | Isocratic         |
| Lambda-cyhalothrin | ZORBAX Eclips Plus C18 | Acetonitrile:Water (80:20)                | 1.0                   | 40                            | 289                            | Isocratic         |
| Methomyl           | ZORBAX Eclips Plus C18 | Acetonitrile:Water (60:40)                | 1.0                   | 30                            | 233                            | Isocratic         |
| Thiophanate-methyl | ZORBAX Eclips Plus C18 | Acetonitrile:Methanol:Water (20:30: 50)   | 1.0                   | 30                            | 269                            | Isocratic         |



1 **Table S2.** Parameters of the isothermal models of Ch-MO NPs for adsorption of different pesticides

| Pesticides         | Sorbents               | Freundlich     |                       |      | Langmuir       |                         |                        |
|--------------------|------------------------|----------------|-----------------------|------|----------------|-------------------------|------------------------|
|                    |                        | R <sup>2</sup> | K <sub>f</sub> (μg/g) | n    | R <sup>2</sup> | q <sub>max</sub> (μg/g) | K <sub>l</sub> (mL/μg) |
| Abamectin          | Ch-CuO NPs             | 0.99           | -0.50                 | 1.02 | 0.99           | 2.50×10 <sup>3</sup>    | -1.48×10 <sup>-3</sup> |
|                    | Ch-ZnO NPs             | 0.99           | -0.48                 | 1.02 | 0.99           | 3.33×10 <sup>3</sup>    | -1.14×10 <sup>-3</sup> |
|                    | ODS (C <sub>18</sub> ) | 0.92           | -0.12                 | 1.27 | 0.98           | 5.00×10 <sup>3</sup>    | 7.31×10 <sup>-4</sup>  |
| Diazinon           | Ch-CuO NPs             | 0.99           | -0.07                 | 1.93 | 0.99           | 2.22×10 <sup>2</sup>    | 1.64×10 <sup>-2</sup>  |
|                    | Ch-ZnO NPs             | 0.99           | -0.33                 | 1.13 | 0.99           | 1.67×10 <sup>3</sup>    | 2.35×10 <sup>-3</sup>  |
|                    | ODS (C <sub>18</sub> ) | 0.99           | -0.41                 | 1.05 | 0.99           | 1.00×10 <sup>4</sup>    | 4.01×10 <sup>-4</sup>  |
| Fenamiphos         | Ch-CuO NPs             | 0.99           | -0.51                 | 1.01 | 0.99           | 1.67×10 <sup>4</sup>    | 2.30×10 <sup>-4</sup>  |
|                    | Ch-ZnO NPs             | 0.99           | -0.46                 | 1.03 | 0.99           | 1.00×10 <sup>4</sup>    | 3.83×10 <sup>-4</sup>  |
|                    | ODS (C <sub>18</sub> ) | 0.99           | -0.57                 | 1.03 | 0.99           | 5.00×10 <sup>3</sup>    | 6.80×10 <sup>-4</sup>  |
| Imidacloprid       | Ch-CuO NPs             | 0.99           | -0.35                 | 1.10 | 0.99           | 3.33×10 <sup>3</sup>    | 1.15×10 <sup>-3</sup>  |
|                    | Ch-ZnO NPs             | 0.99           | -0.46                 | 1.03 | 0.99           | 1.43×10 <sup>4</sup>    | 2.73×10 <sup>-4</sup>  |
|                    | ODS (C <sub>18</sub> ) | 0.95           | 0.03                  | 1.64 | 0.99           | 3.70×10 <sup>2</sup>    | 1.04×10 <sup>-2</sup>  |
| Lambda-cyhalothrin | Ch-CuO NPs             | 0.98           | -0.70                 | 0.59 | 0.99           | 3.33×10 <sup>3</sup>    | -1.15×10 <sup>-3</sup> |
|                    | Ch-ZnO NPs             | 0.98           | -0.66                 | 0.94 | 0.99           | 3.33×10 <sup>3</sup>    | -1.17×10 <sup>-3</sup> |
|                    | ODS (C <sub>18</sub> ) | 0.99           | -0.37                 | 1.10 | 0.99           | 2.00×10 <sup>3</sup>    | 1.95×10 <sup>-3</sup>  |
| Methomyl           | Ch-CuO NPs             | 0.99           | -0.43                 | 1.12 | 0.99           | 2.00×10 <sup>3</sup>    | 1.29×10 <sup>-3</sup>  |
|                    | Ch-ZnO NPs             | 0.99           | -1.07                 | 1.10 | 0.99           | 1.00×10 <sup>3</sup>    | 1.75×10 <sup>-3</sup>  |
|                    | ODS (C <sub>18</sub> ) | 0.99           | -0.39                 | 1.46 | 0.99           | 2.86×10 <sup>2</sup>    | 6.83×10 <sup>-3</sup>  |
| Thiophanate-methyl | Ch-CuO NPs             | 0.99           | -0.78                 | 1.00 | 0.99           | 2.50×10 <sup>4</sup>    | 1.17×10 <sup>-4</sup>  |
|                    | Ch-ZnO NPs             | 0.99           | -0.96                 | 1.00 | 0.99           | 1.00×10 <sup>5</sup>    | 2.41×10 <sup>-5</sup>  |
|                    | ODS (C <sub>18</sub> ) | 0.99           | -0.63                 | 1.03 | 0.99           | 1.00×10 <sup>4</sup>    | 3.17×10 <sup>-4</sup>  |

2 **K<sub>f</sub>**: Freundlich constant indicate the degree of adsorption, **n**: adsorption intensity, and **K<sub>l</sub>**: Langmuir  
3 constant indicate the force of adsorption. **q<sub>max</sub>**: maximum adsorption monolayer capacity.
